# Supplementary material for: Investigation of a new bis(carboxylate)triazole-based anchoring ligand for dye solar cell chromophore complexes
Source: Royal Society of Chemistry journal article supplement (doi:10.1039/c6dt02905a), 2017-01-01
Supplement: c6dt02905a1.pdf [file c6dt02905a1.pdf]

Supporting Information for

**Investigation of new bis(carboxylate)triazole-based anchoring ligands for dye solar cell chromophore complexes**

Alessandro Sinopoli,<sup>a</sup> Fiona A. Black,<sup>b</sup> Christopher J. Wood,<sup>b</sup> Elizabeth A. Gibson<sup>b\*</sup> and Paul I. P. Elliott<sup>a\*</sup>

<sup>a</sup> *Department of Chemistry, University of Huddersfield, Queensgate, Huddersfield, HD1 3DH, UK.*

<sup>b</sup> *School of Chemistry, Bedson Building, Newcastle University, Newcastle upon Tyne, NE1 7RU, UK.*

|                                                                                                    |           |
|----------------------------------------------------------------------------------------------------|-----------|
| <b>Figure S1.</b> <sup>13</sup> C NMR spectrum of <b>detzbp</b> y                                  | p.S2      |
| <b>Figure S2.</b> <sup>1</sup> H NMR spectrum of <b>detzbp</b> y                                   | p.S2      |
| <b>Figure S3.</b> <sup>13</sup> C NMR spectrum of <b>dctzbp</b> y                                  | p.S3      |
| <b>Figure S4.</b> <sup>1</sup> H NMR spectrum of <b>dctzbp</b> y                                   | p.S3      |
| <b>Figure S5.</b> <sup>13</sup> C NMR spectrum of <b>AS16-Et</b> <sub>2</sub>                      | p.S4      |
| <b>Figure S6.</b> <sup>1</sup> H NMR spectrum of <b>AS16-Et</b> <sub>2</sub>                       | p.S4      |
| <b>Figure S7.</b> <sup>13</sup> C NMR spectrum of <b>AS16</b>                                      | p.S5      |
| <b>Figure S8.</b> <sup>1</sup> H NMR spectrum of <b>AS16</b>                                       | p.S5      |
| <b>Figure S9.</b> <sup>13</sup> C NMR spectrum of <b>AS17-Et</b> <sub>2</sub>                      | p.S6      |
| <b>Figure S10.</b> <sup>1</sup> H NMR spectrum of <b>AS17-Et</b> <sub>2</sub>                      | p.S6      |
| <b>Figure S11.</b> <sup>13</sup> C NMR spectrum of <b>AS17</b>                                     | p.S7      |
| <b>Figure S12.</b> <sup>1</sup> H NMR spectrum of <b>AS17</b>                                      | p.S7      |
| <b>Figure S13.</b> <sup>13</sup> C NMR spectrum of <b>AS18-Et</b> <sub>2</sub>                     | p.S8      |
| <b>Figure S14.</b> <sup>1</sup> H NMR spectrum of <b>AS18-Et</b> <sub>2</sub>                      | p.S8      |
| <b>Figure S15.</b> <sup>1</sup> H NMR spectrum of <b>AS18</b>                                      | p.S9      |
| <b>Figure S16.</b> FT-IR spectrum of <b>detzbp</b> y                                               | p.S10     |
| <b>Optimised geometry coordinates for AS16-18</b>                                                  | p.S10-S17 |
| <b>Optimised geometry coordinates for 1-3</b>                                                      | p.S17-S23 |
| <b>Table S1.</b> Summarised TDDFT data for <b>AS16-18</b> and <b>1-3</b>                           | p.S23-S25 |
| <b>Figure S17.</b> UV-vis abs spectra of <b>2</b> and <b>AS16</b> adsorbed onto TiO <sub>2</sub>   | p.S26     |
| <b>Figure S18.</b> Infrared spectra of <b>AS16</b> and <b>AS16</b> immobilised on TiO <sub>2</sub> | p.S26     |

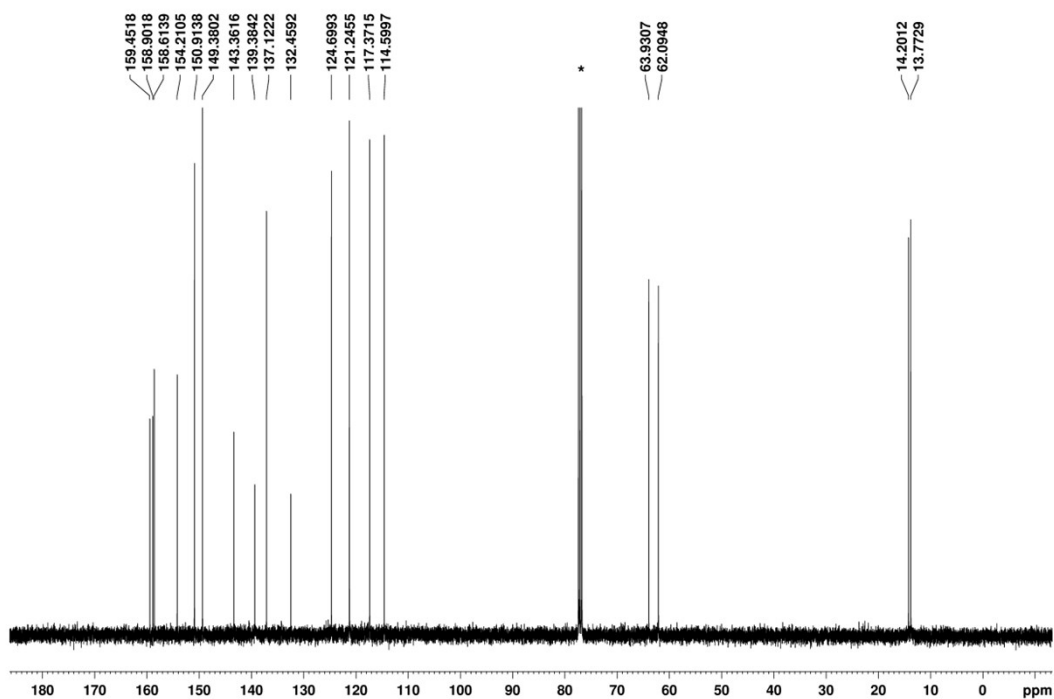

**Figure S1.**  $^{13}\text{C}$  NMR spectrum of **detzbp** in d-chloroform (\* residual solvent signals).

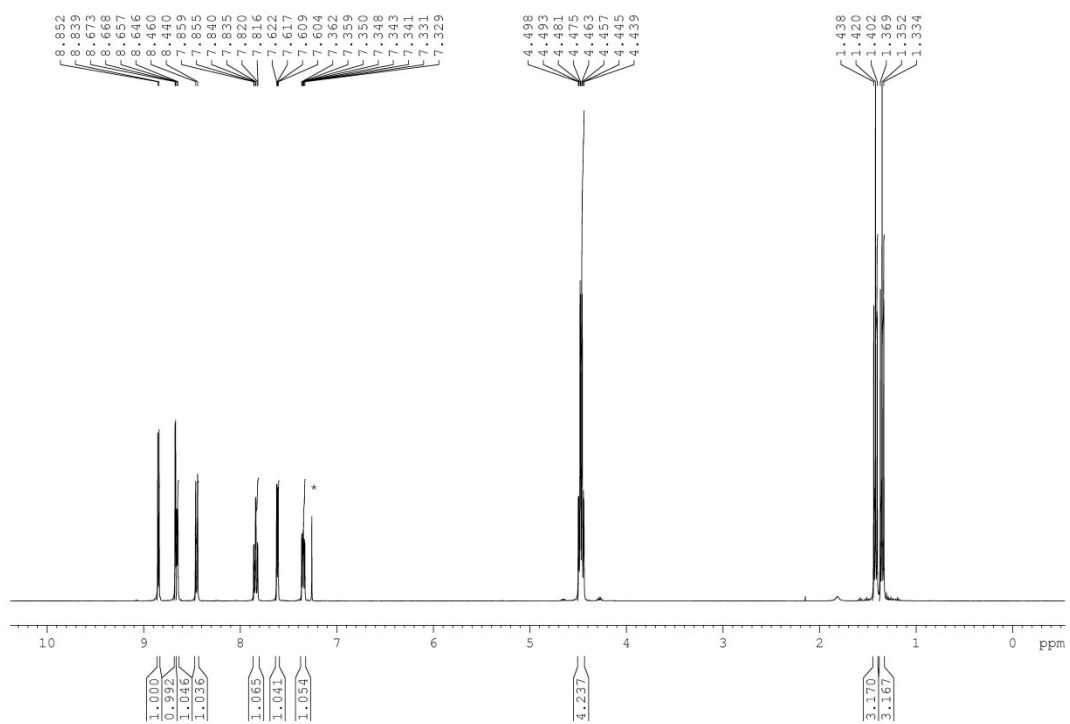

**Figure S2.**  $^1\text{H}$  NMR spectrum of **detzbp** in d-chloroform (\* residual solvent signals).

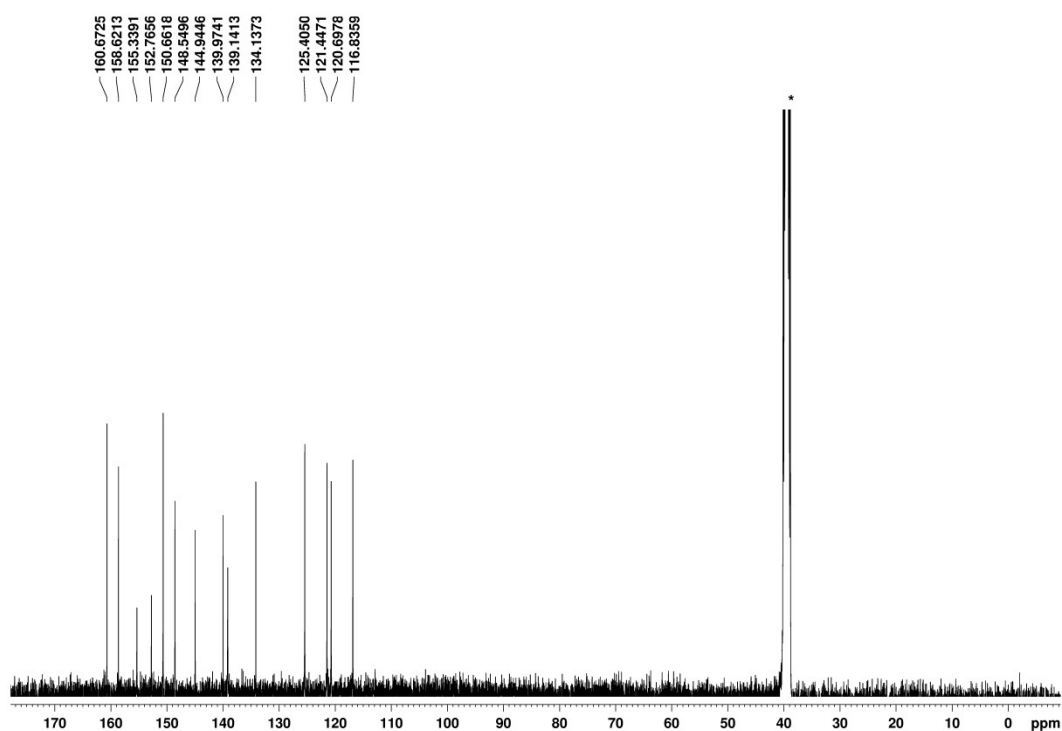

**Figure S3.**  $^{13}\text{C}$  NMR spectrum of **dctzbp** in  $\text{d}_6$ -DMSO (\* residual solvent signals).

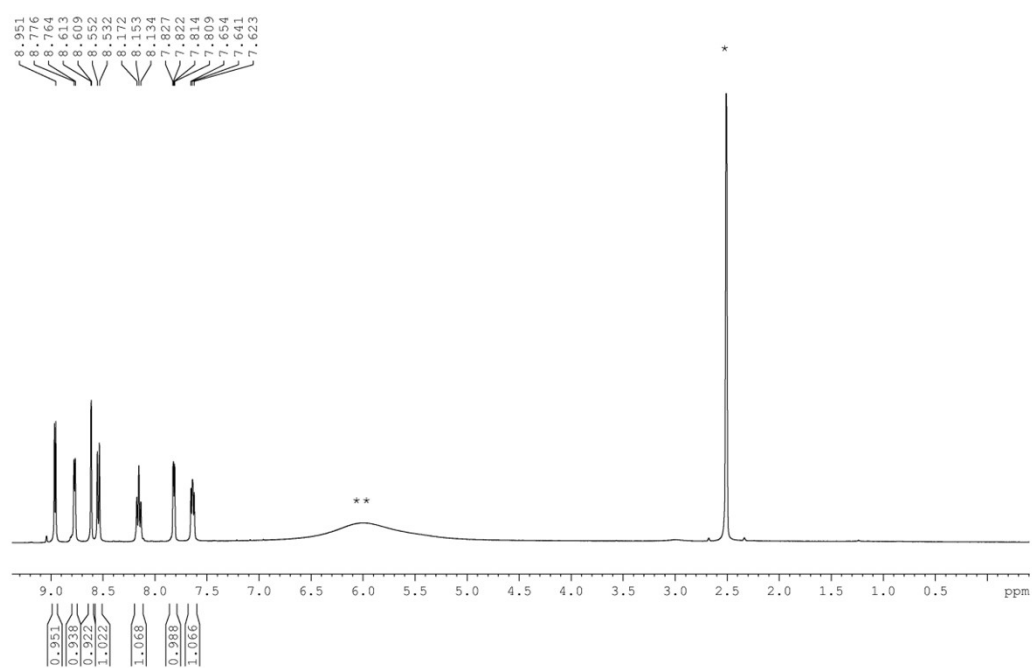

**Figure S4.**  $^1\text{H}$  NMR spectrum of **dctzbp** in  $\text{d}_6$ -DMSO (\* residual solvent signals, \*\* impurity in solvent batch).

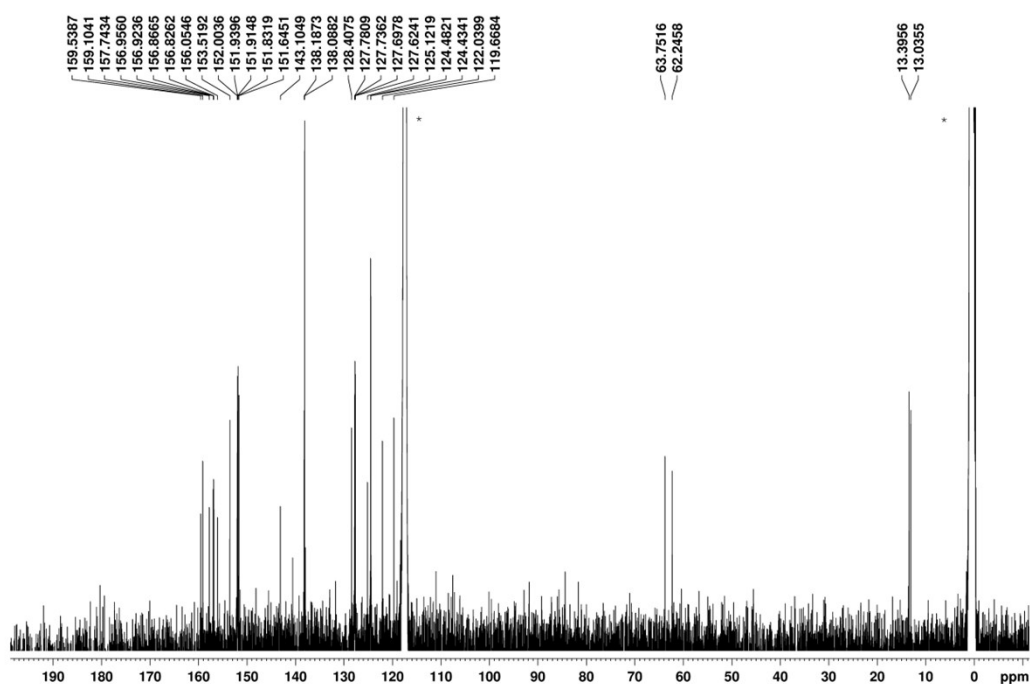

**Figure S5.**  $^{13}\text{C}$  NMR spectrum of **AS16-Et<sub>2</sub>** in  $\text{d}_3$ -acetonitrile (\* residual solvent signals).

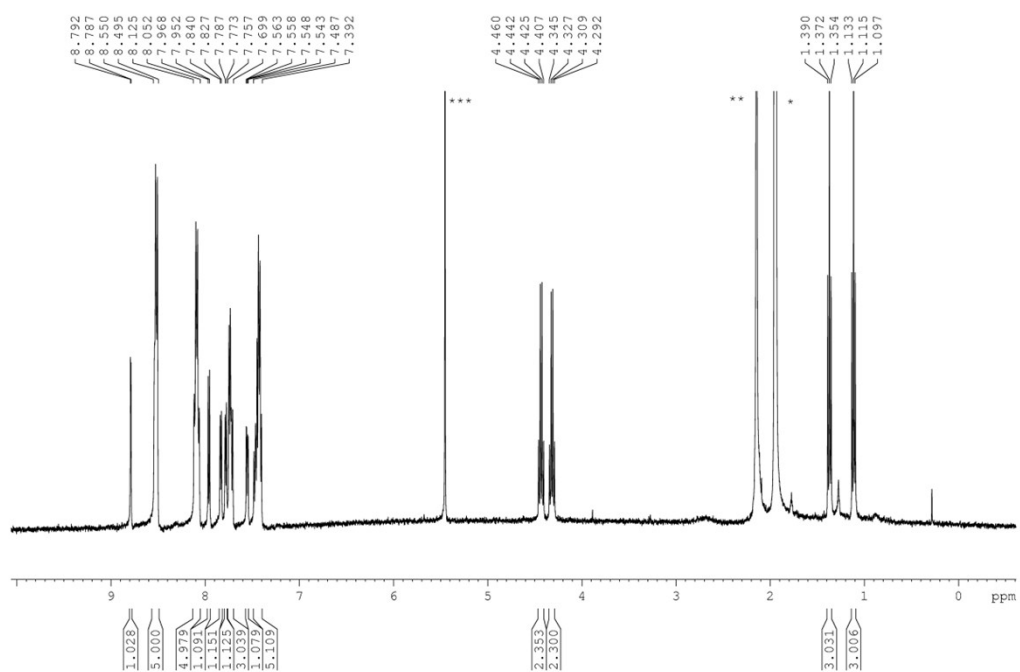

**Figure S6.**  $^1\text{H}$  NMR spectrum of **AS16-Et<sub>2</sub>** in  $\text{d}_3$ -acetonitrile (\* residual solvent signal, \*\* adventitious water signal, \*\*\* adventitious dichlorometane signal).

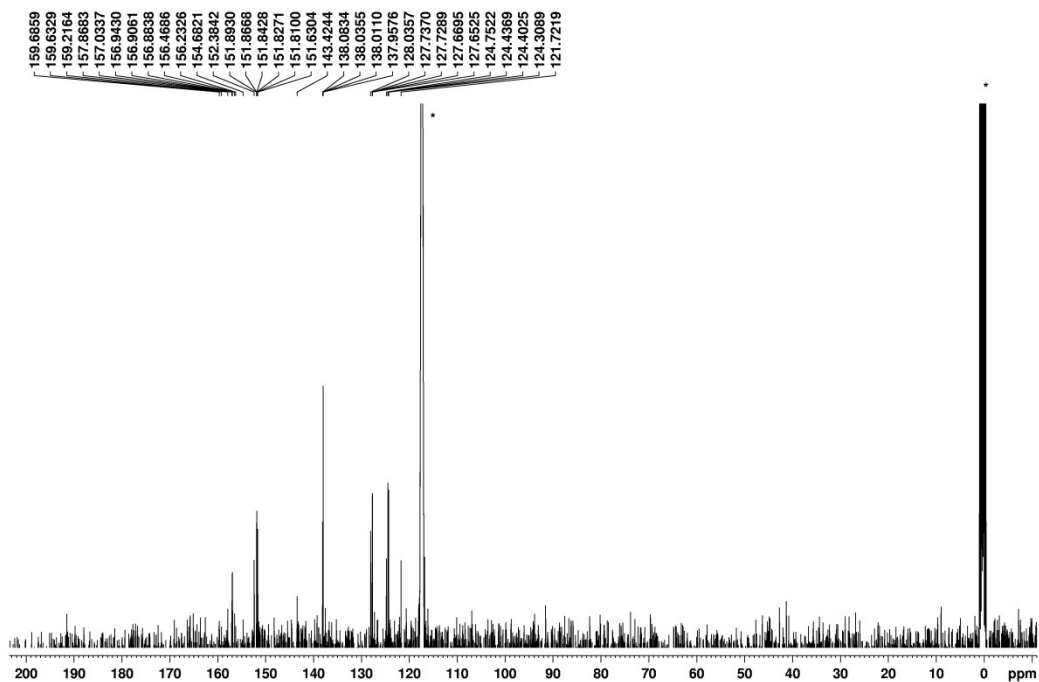

**Figure S7.**  $^{13}\text{C}$  NMR spectrum of **AS16** in  $\text{d}_3$ -acetonitrile (\* residual solvent signals).

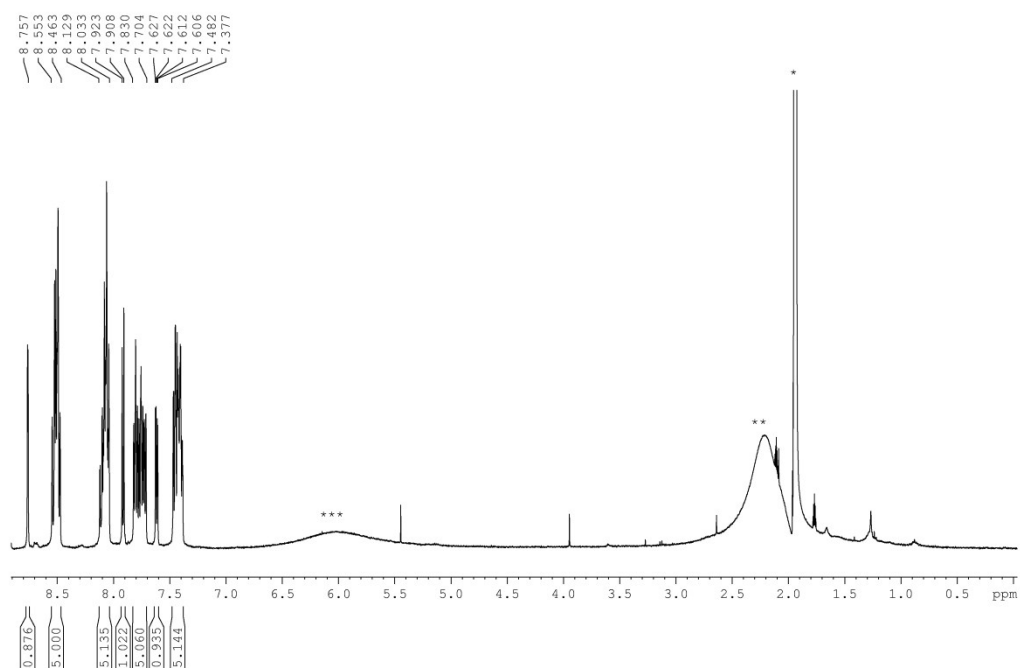

**Figure S8.**  $^1\text{H}$  NMR spectrum of **AS16** in  $\text{d}_3$ -acetonitrile (\* residual solvent signal, \*\* adventitious water signal, \*\*\* impurity in solvent batch).

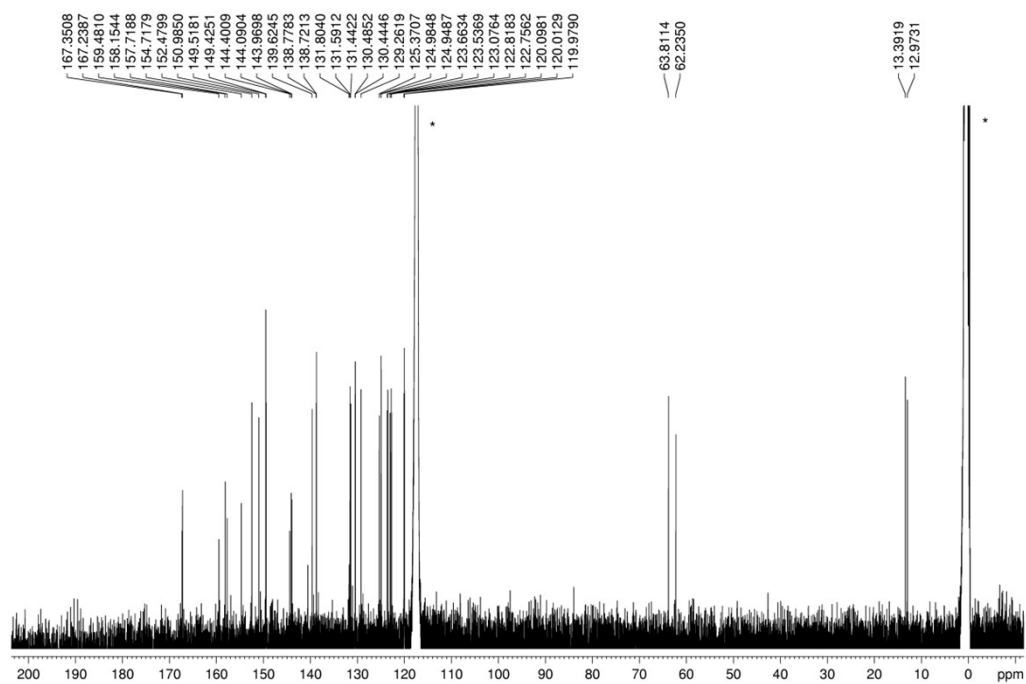

**Figure S9.**  $^{13}\text{C}$  NMR spectrum of **AS17-Et<sub>2</sub>** in  $\text{d}_3$ -acetonitrile (\* residual solvent signals).

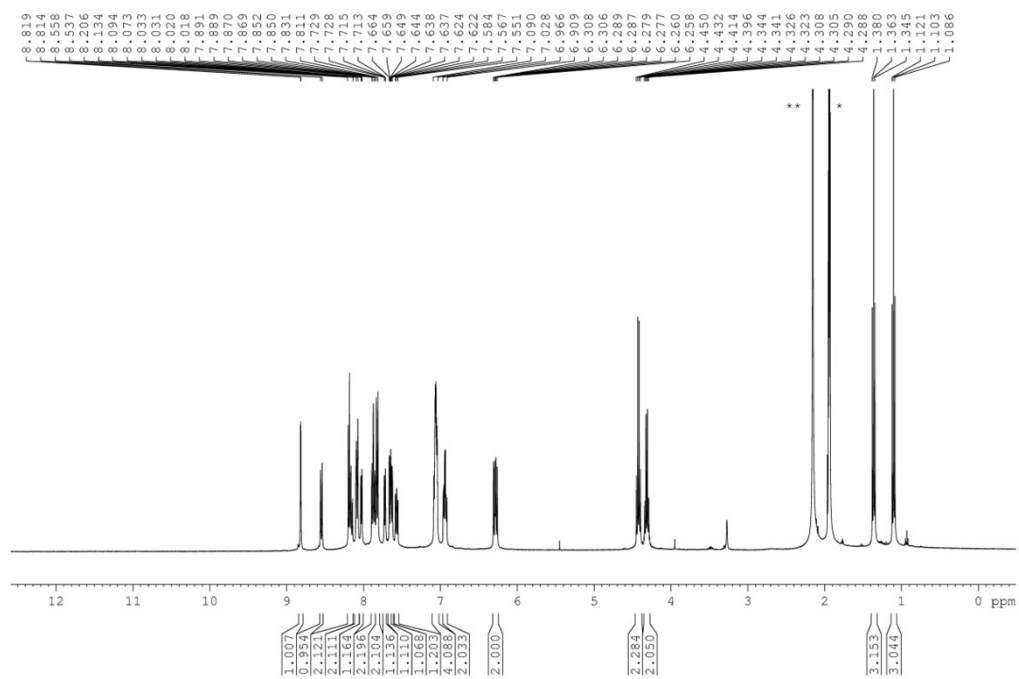

**Figure S10.**  $^1\text{H}$  NMR spectrum of **AS17-Et<sub>2</sub>** in  $\text{d}_3$ -acetonitrile (\* residual solvent signal, \*\* adventitious water signal).

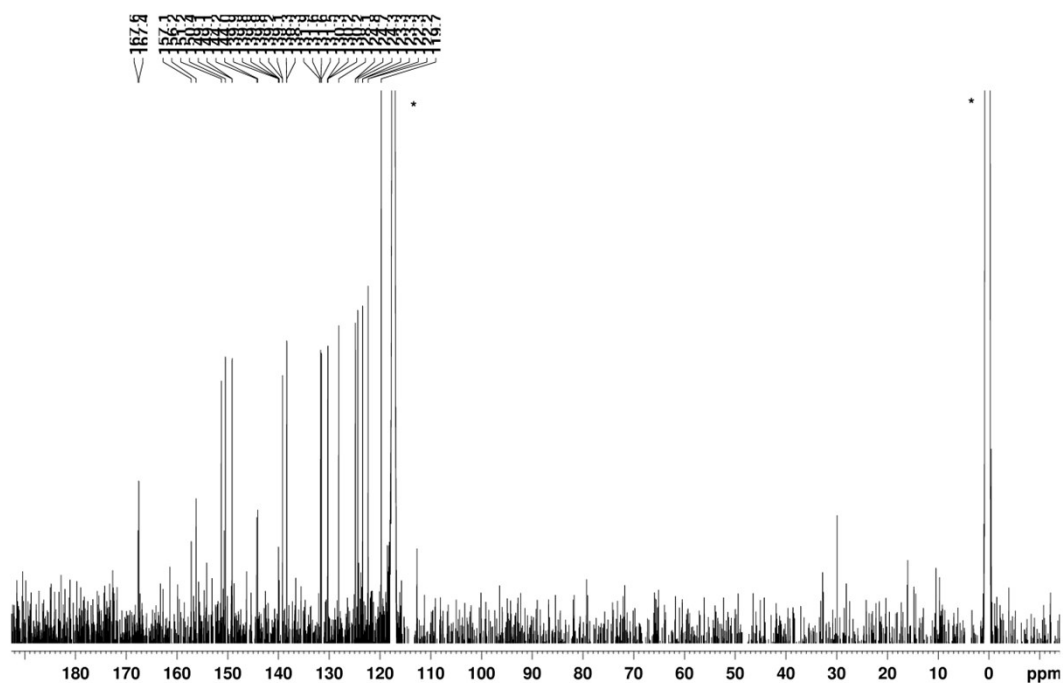

**Figure S11.** <sup>13</sup>C NMR spectrum of **AS17** in d<sub>3</sub>-acetonitrile (\* residual solvent signal, \*\* adventitious acetone signal).

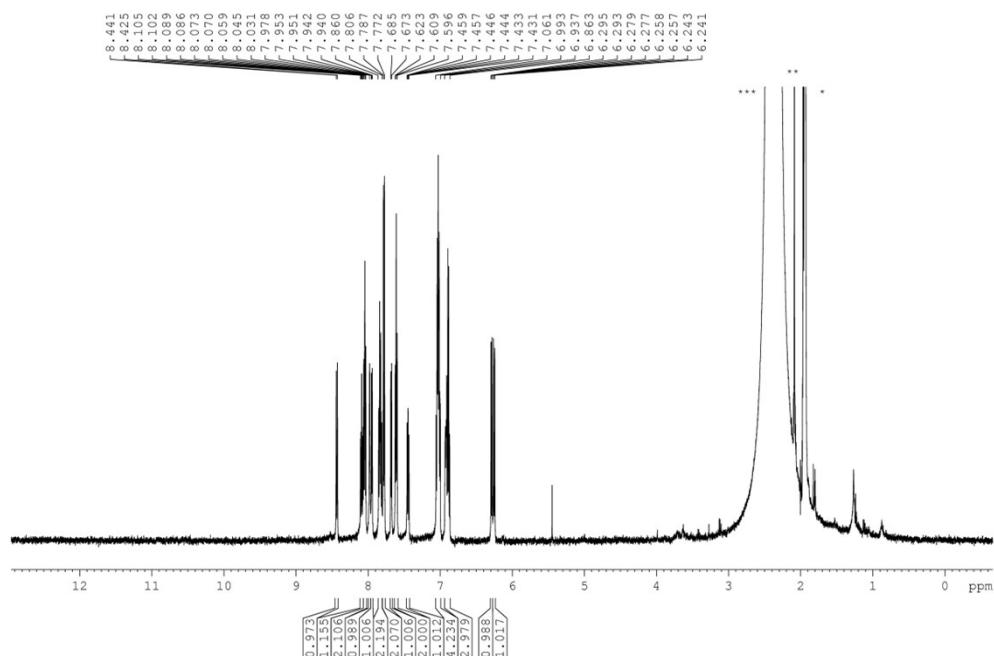

**Figure S12.** <sup>1</sup>H NMR spectrum of **AS17** in d<sub>3</sub>-acetonitrile (\* residual solvent signal, \*\* adventitious acetone signal, \*\*\* adventitious water signal).

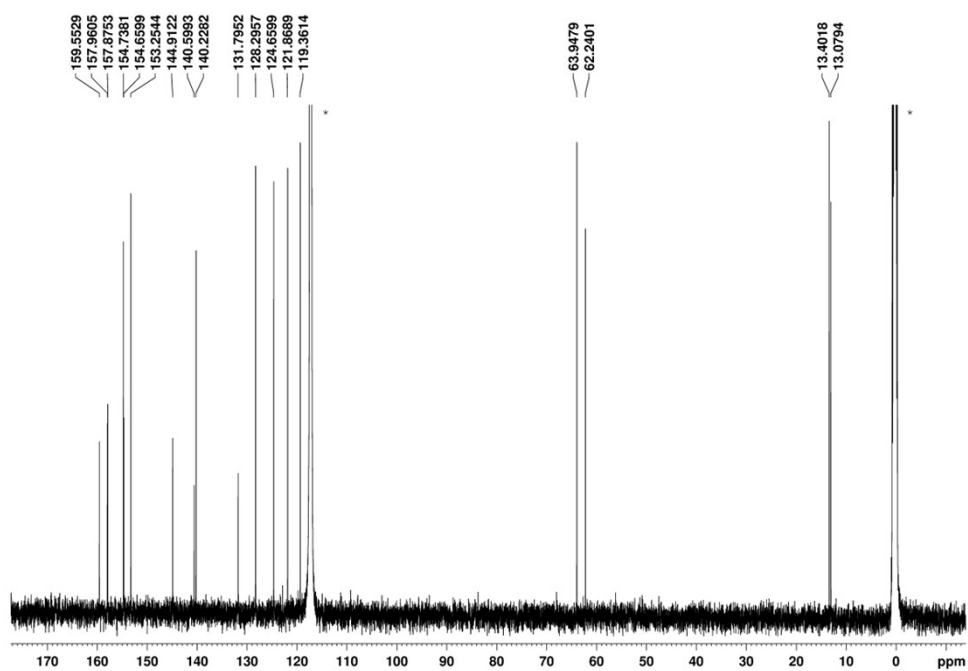

**Figure S13.**  $^{13}\text{C}$  NMR spectrum of **AS18-Et<sub>2</sub>** in  $d_3$ -acetonitrile (\* residual solvent signal).

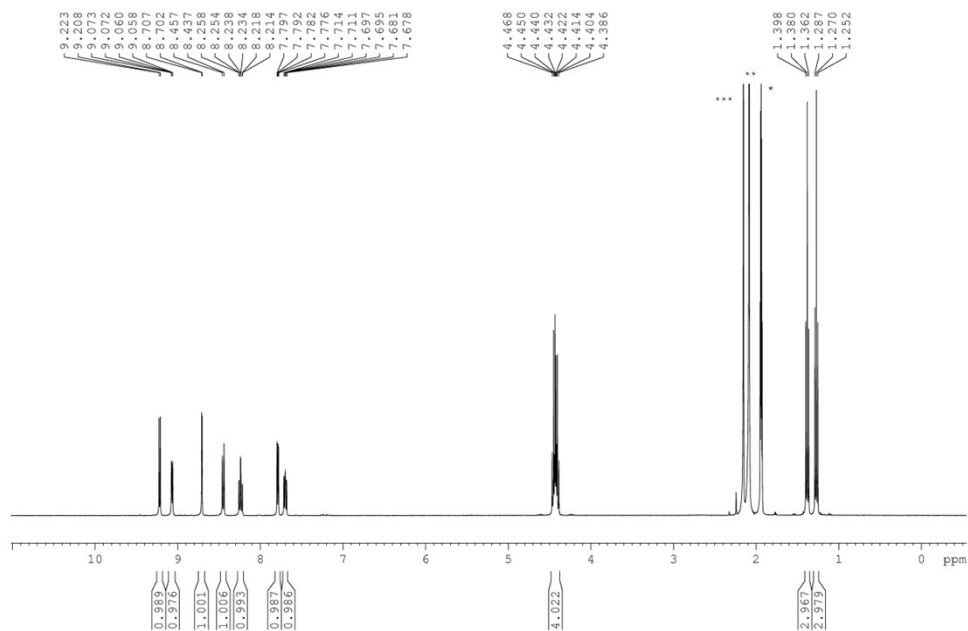

**Figure S14.**  $^1\text{H}$  NMR spectrum of **AS18-Et<sub>2</sub>** in  $d_3$ -acetonitrile (\* residual solvent signal, \*\* adventitious acetone signal, \*\*\* adventitious water signal).



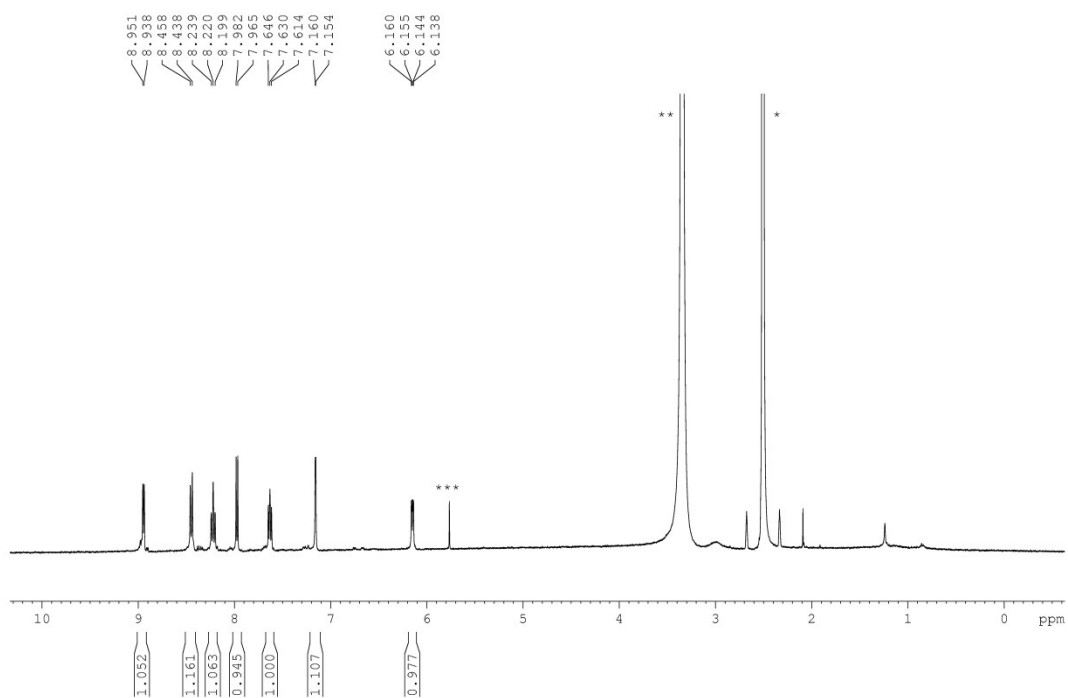

**Figure S15.**  $^1\text{H}$  NMR spectrum of **AS18** in  $\text{d}_6\text{-DMSO}$  (\* residual solvent signal, \*\* adventitious water signal, \*\*\* adventitious dichloromethane signal).

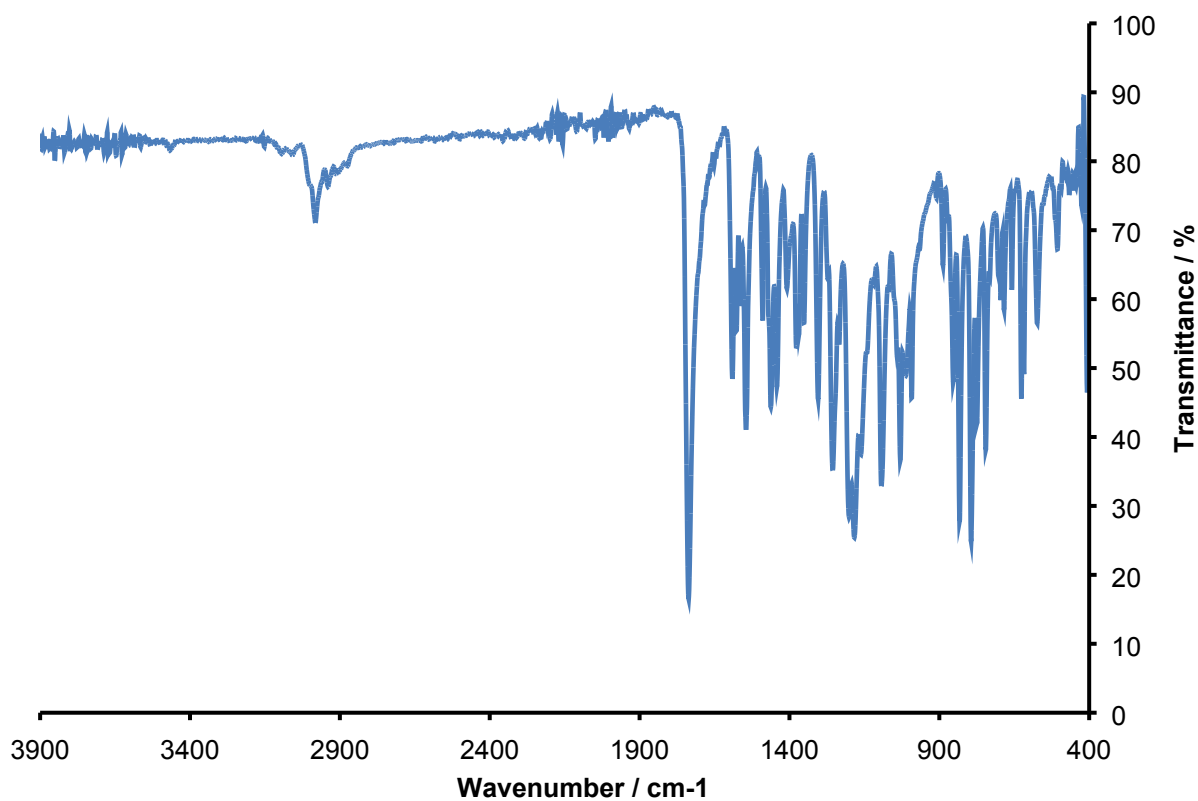

**Figure S16.** FT-IR spectrum of **detzbp**.

**Optimised geometry coordinates for AS16 (.xyz file format)**

73

|   |             |            |             |
|---|-------------|------------|-------------|
| C | 1.84510631  | 5.62075785 | 0.32443377  |
| C | 1.23425005  | 6.45206306 | -0.60566133 |
| C | 0.23642413  | 5.92623165 | -1.42054661 |
| C | -0.11205688 | 4.5917148  | -1.27086094 |
| C | 1.45351129  | 4.28446865 | 0.42684599  |
| H | 2.62108543  | 6.01625576 | 0.96615473  |
| H | 1.53251495  | 7.4904772  | -0.69107355 |
| H | -0.88252491 | 4.14408297 | -1.88450657 |
| C | -3.97415578 | 2.79784932 | 1.25302497  |
| C | -3.87232709 | 3.16170913 | 2.58958735  |

|   |             |             |             |
|---|-------------|-------------|-------------|
| C | -2.62319249 | 3.12167067  | 3.20137001  |
| C | -1.52686138 | 2.72044699  | 2.45202165  |
| C | -2.83466947 | 2.4001101   | 0.55079328  |
| H | -4.93844472 | 2.82647233  | 0.76355835  |
| H | -4.75244244 | 3.47063622  | 3.14134126  |
| H | -0.53860259 | 2.6753652   | 2.88995121  |
| C | -2.84854714 | 1.99407044  | -0.86742008 |
| C | -1.57070481 | 1.2859044   | -2.6821674  |
| C | -4.00580818 | 1.94367556  | -1.64695823 |
| C | -2.68491828 | 1.21868751  | -3.50603527 |
| H | -0.58631524 | 1.03441842  | -3.05407089 |
| H | -4.96600405 | 2.20440026  | -1.22231519 |
| H | -2.57283129 | 0.90777703  | -4.53751777 |
| C | -3.92799991 | 1.5526521   | -2.97757533 |
| H | -4.82218524 | 1.50938724  | -3.58834821 |
| N | -1.63578485 | 1.66325216  | -1.39206019 |
| C | 2.01269516  | 1.14787393  | 2.19870469  |
| C | 2.04875984  | 3.32863369  | 1.37986264  |
| C | 3.03612237  | 1.41346842  | 3.09670381  |
| H | 1.55989625  | 0.16687644  | 2.14228331  |
| C | 3.08233993  | 3.65497843  | 2.26020377  |
| H | 3.39255781  | 0.62935041  | 3.75342183  |
| H | 3.49919175  | 4.65317845  | 2.27142066  |
| N | 1.51967914  | 2.07355782  | 1.35548442  |
| C | 3.58329969  | 2.69258569  | 3.12740455  |
| H | 4.38602648  | 2.93806669  | 3.8128621   |
| H | -0.26916286 | 6.53426637  | -2.16071926 |
| H | -2.49284645 | 3.39648664  | 4.24090593  |
| C | 1.52270326  | -0.42005345 | -1.37218145 |

|   |             |             |             |
|---|-------------|-------------|-------------|
| C | 2.47558041  | -1.08102243 | -2.14997584 |
| C | 3.34643475  | -0.34389462 | -2.9428531  |
| C | 3.24732022  | 1.04415962  | -2.93765122 |
| C | 2.28808269  | 1.6425204   | -2.13290666 |
| N | 1.43883175  | 0.93920478  | -1.36188275 |
| H | 4.08979699  | -0.84623793 | -3.55073909 |
| H | 2.54883073  | -2.16088557 | -2.12970959 |
| H | 3.90361292  | 1.66060577  | -3.53976443 |
| H | 2.18383441  | 2.7188833   | -2.09558776 |
| C | 0.55339488  | -1.11782421 | -0.50713142 |
| C | 0.43758823  | -2.50560006 | -0.47906878 |
| C | -0.48360062 | -3.09778562 | 0.37942605  |
| H | 1.03966539  | -3.12891444 | -1.122364   |
| C | -1.13252492 | -0.9052879  | 1.07355087  |
| H | -1.74343742 | -0.24040743 | 1.66932435  |
| N | -0.23880782 | -0.31719584 | 0.25470589  |
| C | -1.2841814  | -2.27542838 | 1.17962116  |
| H | -2.0195035  | -2.69926695 | 1.84896342  |
| N | -0.68275512 | -4.49495663 | 0.42460483  |
| C | 0.13341271  | -5.58101858 | 0.22434195  |
| C | -0.70022093 | -6.66468132 | 0.41596587  |
| N | -1.95348727 | -4.93174163 | 0.74384166  |
| N | -1.95124664 | -6.2095575  | 0.7242231   |
| C | -0.36571956 | -8.10039722 | 0.2059757   |
| O | 0.60090695  | -8.45747587 | -0.41653774 |
| O | -1.26776159 | -8.90646492 | 0.76719412  |
| H | -1.02127189 | -9.82437295 | 0.56983027  |
| C | 1.58935071  | -5.55516655 | -0.1073378  |
| O | 2.08104437  | -4.88937831 | -0.98873751 |

|    |             |             |             |
|----|-------------|-------------|-------------|
| O  | 2.26614557  | -6.35757019 | 0.70390299  |
| H  | 3.18054637  | -6.44155616 | 0.38747464  |
| Ru | -0.00766077 | 1.7526669   | -0.05757478 |
| N  | 0.47460361  | 3.77802936  | -0.37391348 |
| N  | -1.61554098 | 2.36290874  | 1.15762758  |

**Optimised geometry coordinates for AS17 (.xyz file format)**

73

|    |             |             |             |
|----|-------------|-------------|-------------|
| C  | -1.92651534 | -5.46305998 | 0.19781784  |
| C  | -1.32690242 | -6.28100272 | -0.74823173 |
| C  | -0.27243718 | -5.78314971 | -1.51610995 |
| C  | 0.17774183  | -4.47510236 | -1.34167267 |
| C  | -0.41117195 | -3.62312842 | -0.39929562 |
| C  | -1.47700836 | -4.14531329 | 0.37846605  |
| H  | -2.74272163 | -5.85807478 | 0.79378791  |
| H  | -1.67213364 | -7.29972619 | -0.88504901 |
| H  | 1.00686906  | -4.12579448 | -1.94737286 |
| C  | 3.95773564  | -2.61940047 | 1.35970282  |
| C  | 3.83791147  | -2.95331403 | 2.70064579  |
| C  | 2.57616621  | -2.95158978 | 3.29818350  |
| C  | 1.44144467  | -2.61542207 | 2.56069655  |
| C  | 1.53081172  | -2.26832702 | 1.20713222  |
| C  | 2.81884001  | -2.28089168 | 0.61193600  |
| H  | 4.94122207  | -2.62599950 | 0.90139332  |
| H  | 4.71760019  | -3.21753512 | 3.27685326  |
| H  | 0.47583196  | -2.63557962 | 3.05439503  |
| Ir | 0.03184237  | -1.67483637 | -0.03029339 |

|   |             |             |             |
|---|-------------|-------------|-------------|
| C | 2.86426141  | -1.92541714 | -0.80435309 |
| C | 1.57425418  | -1.27121280 | -2.65317410 |
| C | 4.01184700  | -1.90709366 | -1.60849929 |
| C | 2.67776690  | -1.24147636 | -3.48620517 |
| H | 0.58441012  | -1.03685411 | -3.02188077 |
| H | 4.96936653  | -2.16831971 | -1.17743997 |
| H | 2.56006686  | -0.97431250 | -4.52902873 |
| C | 3.92343834  | -1.56590835 | -2.94728443 |
| H | 4.81257879  | -1.55562976 | -3.56790560 |
| N | 1.65466171  | -1.59874959 | -1.34979612 |
| C | -1.93682406 | -1.05624659 | 2.24150296  |
| C | -2.05150419 | -3.22815469 | 1.35926430  |
| C | -2.94592189 | -1.30988852 | 3.15244333  |
| H | -1.44465913 | -0.09355133 | 2.20030685  |
| C | -3.07943236 | -3.53203799 | 2.26232389  |
| H | -3.26067182 | -0.53461201 | 3.83993609  |
| H | -3.51556998 | -4.52233090 | 2.26009907  |
| N | -1.49734816 | -1.97900047 | 1.36543946  |
| C | -3.52891009 | -2.57786100 | 3.15883738  |
| H | -4.32119471 | -2.81725832 | 3.85947444  |
| H | 0.20665306  | -6.42183742 | -2.25189447 |
| H | 2.47553514  | -3.22035846 | 4.34530869  |
| C | -1.54474046 | 0.60533500  | -1.35987243 |
| C | -2.52332553 | 1.28646112  | -2.08827435 |
| C | -3.42456698 | 0.56547766  | -2.86263852 |
| C | -3.33324544 | -0.82200684 | -2.88916566 |
| C | -2.34789161 | -1.43886452 | -2.12855008 |
| N | -1.47371112 | -0.74853413 | -1.38059443 |
| H | -4.18823097 | 1.08309282  | -3.43188049 |

|   |             |             |             |
|---|-------------|-------------|-------------|
| H | -2.59740724 | 2.36532624  | -2.04238987 |
| H | -4.01423816 | -1.42384884 | -3.47867256 |
| H | -2.23950297 | -2.51646477 | -2.10296634 |
| C | -0.54089682 | 1.29953766  | -0.51746976 |
| C | -0.40243180 | 2.68767525  | -0.52547959 |
| C | 0.54036128  | 3.27834770  | 0.30804048  |
| H | -1.00105307 | 3.30588434  | -1.17554156 |
| C | 1.17469981  | 1.09837693  | 1.03522627  |
| H | 1.78482677  | 0.42528384  | 1.62495213  |
| N | 0.25308203  | 0.51624925  | 0.25018548  |
| C | 1.34889110  | 2.47043986  | 1.10913563  |
| H | 2.10270701  | 2.90070903  | 1.75354781  |
| N | 0.74336326  | 4.68257308  | 0.32272940  |
| C | -0.10585190 | 5.74799503  | 0.20277908  |
| C | 0.71964559  | 6.84925971  | 0.32498661  |
| N | 2.02583923  | 5.13756126  | 0.52873926  |
| N | 2.00013806  | 6.41862775  | 0.51694390  |
| C | 0.32753920  | 8.27137738  | 0.16953514  |
| O | -0.73312483 | 8.61311939  | -0.29046643 |
| O | 1.28650985  | 9.10695909  | 0.58107593  |
| H | 0.97719327  | 10.01309491 | 0.42425348  |
| C | -1.58343528 | 5.68859302  | -0.00419336 |
| O | -2.12739106 | 5.09091887  | -0.90116771 |
| O | -2.21785055 | 6.38041156  | 0.93895488  |
| H | -3.15975964 | 6.43390044  | 0.70914519  |

**Optimised geometry coordinates for AS18 (.xyz file format)**

|   |             |             |             |
|---|-------------|-------------|-------------|
| C | 1.78565719  | 0.55422290  | 0.36812885  |
| C | 3.03231340  | -0.06568080 | 0.47461322  |
| C | 4.18122495  | 0.71112769  | 0.52304915  |
| C | 4.05932126  | 2.09492504  | 0.46451040  |
| C | 2.79205885  | 2.64677759  | 0.34759130  |
| N | 1.67595819  | 1.90309945  | 0.29954928  |
| H | 5.15483758  | 0.24046029  | 0.59959774  |
| H | 3.11281994  | -1.14425920 | 0.50015841  |
| H | 4.92582095  | 2.74407685  | 0.49585547  |
| H | 2.65280403  | 3.71732837  | 0.28057185  |
| C | 0.51473915  | -0.19545994 | 0.31943966  |
| C | 0.46515215  | -1.58607342 | 0.42118607  |
| C | -0.76312735 | -2.22495937 | 0.33362906  |
| H | 1.36254468  | -2.16613690 | 0.56479710  |
| C | -1.79561188 | -0.09036744 | 0.13271150  |
| H | -2.66857839 | 0.53805957  | 0.02077001  |
| N | -0.61162613 | 0.54315677  | 0.18515231  |
| C | -1.92452591 | -1.46620631 | 0.19432375  |
| H | -2.89712414 | -1.93457335 | 0.13937774  |
| N | -0.86834180 | -3.64165816 | 0.41783224  |
| C | -0.09462544 | -4.64508688 | -0.08473389 |
| C | -0.75696549 | -5.79939296 | 0.28868981  |
| N | -1.96282203 | -4.17586172 | 1.05351573  |
| N | -1.88140602 | -5.45479881 | 0.97908635  |
| C | -0.29812775 | -7.18525443 | 0.05889438  |
| O | 0.80975024  | -7.45962901 | -0.33442727 |
| O | -1.24174693 | -8.09336265 | 0.34460628  |
| H | -0.85437388 | -8.96812075 | 0.18659739  |



|    |             |             |             |
|----|-------------|-------------|-------------|
| C  | 1.17575466  | -4.48293768 | -0.85445834 |
| O  | 2.16709774  | -3.94519531 | -0.42886899 |
| O  | 1.06112263  | -5.01085999 | -2.07292394 |
| H  | 1.92691223  | -4.96579142 | -2.50982702 |
| Re | -0.35069616 | 2.72379935  | -0.09454024 |
| Cl | 0.18141248  | 2.03431479  | -2.46492173 |
| C  | -0.69497027 | 3.15249262  | 1.76098055  |
| O  | -0.89689970 | 3.40442508  | 2.87039100  |
| C  | -2.18187622 | 3.15138159  | -0.58213020 |
| O  | -3.27453212 | 3.35575583  | -0.87872966 |
| C  | 0.16137057  | 4.56193325  | -0.46723015 |
| O  | 0.50570945  | 5.63580723  | -0.69336911 |

**Optimised geometry coordinates for 1 (.xyz file format)**

67

|   |             |             |             |
|---|-------------|-------------|-------------|
| C | 3.16933984  | -3.56657702 | -0.69589279 |
| C | 3.36807446  | -4.24867110 | 0.49774310  |
| C | 2.58700138  | -3.91291928 | 1.59921937  |
| C | 1.63732223  | -2.91090241 | 1.46202577  |
| N | 1.43803480  | -2.24371799 | 0.31051052  |
| C | 2.19937210  | -2.56519896 | -0.77230856 |
| H | 3.76797778  | -3.81846281 | -1.56103767 |
| H | 4.11861015  | -5.02762034 | 0.56454862  |
| H | 2.70452514  | -4.41578820 | 2.55130639  |
| H | 1.01000388  | -2.61997141 | 2.29410299  |
| C | -3.17668071 | -3.55898360 | 0.70401368  |
| C | -3.37677670 | -4.24314259 | -0.48821323 |
| C | -2.59504260 | -3.91122026 | -1.59038263 |

|    |             |             |             |
|----|-------------|-------------|-------------|
| C  | -1.64341419 | -2.91077257 | -1.45527722 |
| N  | -1.44280343 | -2.24160843 | -0.30514248 |
| C  | -2.20471542 | -2.55938637 | 0.77836290  |
| H  | -3.77583286 | -3.80787437 | 1.56966979  |
| H  | -4.12885785 | -5.02073622 | -0.55341339 |
| H  | -2.71354321 | -4.41583990 | -2.54142114 |
| H  | -1.01554893 | -2.62277040 | -2.28796100 |
| C  | 0.70072060  | 2.12955411  | 0.23097910  |
| C  | 1.43429856  | 3.29093587  | 0.45989861  |
| C  | 2.75014120  | 3.20481854  | 0.90270596  |
| C  | 3.30653770  | 1.94341037  | 1.10848490  |
| C  | 2.52459544  | 0.82443217  | 0.86100402  |
| N  | 1.25054859  | 0.89843332  | 0.43354377  |
| H  | 1.01111263  | 4.27444762  | 0.30147685  |
| H  | 4.32653173  | 1.83232915  | 1.45219346  |
| H  | 2.91948761  | -0.17171842 | 1.00906849  |
| C  | -0.69686506 | 2.13037947  | -0.23595183 |
| C  | -1.42799683 | 3.29266599  | -0.46808578 |
| C  | -2.74395902 | 3.20809817  | -0.91083796 |
| H  | -1.00276309 | 4.27571636  | -0.31230385 |
| C  | -2.52340280 | 0.82736577  | -0.86262356 |
| C  | -3.30297052 | 1.94730050  | -1.11324812 |
| H  | -2.92035642 | -0.16835275 | -1.00805253 |
| H  | -4.32314444 | 1.83742256  | -1.45681185 |
| N  | -1.24923676 | 0.89986251  | -0.43525542 |
| Ru | -0.00095238 | -0.73458966 | 0.00106069  |
| C  | 3.49819240  | 4.48906530  | 1.13299932  |
| O  | 3.00957335  | 5.57100322  | 0.95190248  |
| O  | 4.74945931  | 4.26619924  | 1.55619832  |

|   |             |             |             |
|---|-------------|-------------|-------------|
| H | 5.19306769  | 5.11936684  | 1.69081227  |
| C | -3.48927242 | 4.49327292  | -1.14480494 |
| O | -2.99840388 | 5.57468110  | -0.96664921 |
| O | -4.74094301 | 4.27186412  | -1.56757630 |
| H | -5.18274025 | 5.12558332  | -1.70462546 |
| C | -1.92597438 | -1.77936066 | 1.99924826  |
| C | -0.60941654 | -0.11908662 | 2.96802829  |
| C | -2.62539749 | -1.94029339 | 3.19688431  |
| C | -1.26706821 | -0.23515399 | 4.18403958  |
| H | 0.19634706  | 0.59073663  | 2.83614537  |
| H | -3.42547279 | -2.66448273 | 3.27253058  |
| H | -0.97448758 | 0.39388993  | 5.01582360  |
| C | -2.29668710 | -1.16376566 | 4.30076112  |
| H | -2.83605011 | -1.28204798 | 5.23329903  |
| N | -0.91975335 | -0.86732514 | 1.89339661  |
| C | 0.60888803  | -0.12635730 | -2.96709758 |
| C | 1.92227348  | -1.78707956 | -1.99478440 |
| C | 1.26665174  | -0.24590547 | -4.18270804 |
| H | -0.19566073 | 0.58513076  | -2.83678552 |
| C | 2.62172667  | -1.95153290 | -3.19192423 |
| H | 0.97540179  | 0.38206379  | -5.01577064 |
| H | 3.42057147  | -2.67724486 | -3.26595662 |
| N | 0.91766202  | -0.87304667 | -1.89094017 |
| C | 2.29469099  | -1.17652151 | -4.29736413 |
| H | 2.83413186  | -1.29748023 | -5.22951295 |

**Optimised geometry coordinates for 2 (.xyz file format)**

|   |             |             |             |
|---|-------------|-------------|-------------|
| C | 3.21416565  | -3.46888691 | -0.73180128 |
| C | 3.47239825  | -4.11615960 | 0.46737983  |
| C | 2.69670310  | -3.81780605 | 1.58910836  |
| C | 1.67046827  | -2.87673164 | 1.51314764  |
| C | 1.38881431  | -2.20357498 | 0.31814749  |
| C | 2.18187088  | -2.52110691 | -0.81439502 |
| H | 3.81965296  | -3.70787563 | -1.59992174 |
| H | 4.26762116  | -4.85061263 | 0.52954469  |
| H | 2.88915764  | -4.32737876 | 2.52832954  |
| H | 1.08097824  | -2.67808293 | 2.40170876  |
| C | -3.23929983 | -3.43572560 | 0.76072460  |
| C | -3.50258083 | -4.09318114 | -0.43180746 |
| C | -2.72425531 | -3.81274470 | -1.55631535 |
| C | -1.69033883 | -2.87934354 | -1.48968542 |
| C | -1.40340022 | -2.19626284 | -0.30157274 |
| C | -2.19926217 | -2.49568685 | 0.83396331  |
| H | -3.84701570 | -3.66058648 | 1.63104025  |
| H | -4.30378723 | -4.82170509 | -0.48666356 |
| H | -2.92084680 | -4.33028816 | -2.49032650 |
| H | -1.09914931 | -2.69453113 | -2.38010972 |
| C | 0.72104873  | 2.22147229  | 0.19026978  |
| C | 1.45816609  | 3.39058098  | 0.37087219  |
| C | 2.79620875  | 3.31250822  | 0.74543026  |
| C | 3.37386920  | 2.05760554  | 0.92845749  |
| C | 2.58461459  | 0.93227002  | 0.73080750  |
| N | 1.29266563  | 1.00434320  | 0.37573280  |
| H | 1.02368236  | 4.37085382  | 0.22755464  |
| H | 4.41151047  | 1.95503520  | 1.21687873  |

|    |             |             |             |
|----|-------------|-------------|-------------|
| H  | 2.98118115  | -0.06746304 | 0.85864565  |
| C  | -0.70682243 | 2.22446311  | -0.20848556 |
| C  | -1.43779165 | 3.39668024  | -0.39374256 |
| C  | -2.77568973 | 3.32420287  | -0.76994137 |
| H  | -0.99865591 | 4.37520689  | -0.25269951 |
| C  | -2.57631360 | 0.94298647  | -0.74683891 |
| C  | -3.35935706 | 2.07167773  | -0.95019019 |
| H  | -2.97804225 | -0.05516237 | -0.87100282 |
| H  | -4.39694512 | 1.97338868  | -1.24032697 |
| N  | -1.28467007 | 1.00964487  | -0.38962700 |
| Ir | -0.00178514 | -0.75434205 | 0.00096554  |
| C  | 3.54745959  | 4.59771517  | 0.93082760  |
| O  | 3.05626163  | 5.68401743  | 0.77288827  |
| O  | 4.82387306  | 4.38798923  | 1.29279234  |
| H  | 5.25623864  | 5.25024862  | 1.39682926  |
| C  | -3.52023094 | 4.61269061  | -0.95967658 |
| O  | -3.02443474 | 5.69685970  | -0.80164833 |
| O  | -4.79656759 | 4.40840504  | -1.32518878 |
| H  | -5.22460488 | 5.27253070  | -1.43175288 |
| C  | -1.85920528 | -1.76795093 | 2.05393301  |
| C  | -0.42828405 | -0.15585747 | 2.98274166  |
| C  | -2.47882889 | -1.92473462 | 3.30130642  |
| C  | -1.00780078 | -0.27648176 | 4.23246072  |
| H  | 0.39439687  | 0.52499892  | 2.80899960  |
| H  | -3.28656354 | -2.63652756 | 3.41002448  |
| H  | -0.64166339 | 0.32189119  | 5.05745254  |
| C  | -2.05745527 | -1.18235341 | 4.39104436  |
| H  | -2.53648388 | -1.30819580 | 5.35570649  |
| N  | -0.83539069 | -0.87313804 | 1.91847354  |

|   |             |             |             |
|---|-------------|-------------|-------------|
| C | 0.43050294  | -0.18789152 | -2.98627153 |
| C | 1.84740829  | -1.80298810 | -2.04150621 |
| C | 1.00855274  | -0.32639229 | -4.23483684 |
| H | -0.38582303 | 0.50223549  | -2.81922264 |
| C | 2.46520844  | -1.97797178 | -3.28728869 |
| H | 0.64766275  | 0.26697062  | -5.06571289 |
| H | 3.26670403  | -2.69785319 | -3.38853249 |
| N | 0.83121981  | -0.89821447 | -1.91492135 |
| C | 2.04981661  | -1.24341997 | -4.38456265 |
| H | 2.52695999  | -1.38401201 | -5.34812523 |

**Optimised geometry coordinates for 3 (.xyz file format)**

34

|    |             |             |             |
|----|-------------|-------------|-------------|
| Re | -0.00249836 | 1.71017522  | -0.05247418 |
| C  | -0.00858698 | 1.97868420  | -1.97127669 |
| O  | -0.01235433 | 2.13413063  | -3.11588192 |
| C  | -1.37486807 | 3.06907360  | 0.18644078  |
| O  | -2.21600218 | 3.83785654  | 0.33965324  |
| C  | 1.36846429  | 3.07198309  | 0.17755361  |
| O  | 2.20902263  | 3.84258582  | 0.32476991  |
| Cl | 0.00499387  | 1.22246414  | 2.42099736  |
| C  | 2.88587647  | -2.35913610 | -0.06160693 |
| C  | 3.48654921  | -1.10159423 | -0.10323331 |
| C  | 2.67200577  | 0.01883602  | -0.14006215 |
| C  | 0.73815311  | -1.27118075 | -0.09216975 |
| C  | 1.49812587  | -2.43819438 | -0.05647223 |
| H  | 4.56254883  | -0.99293318 | -0.10251848 |
| H  | 3.09661113  | 1.01305650  | -0.16596583 |

S22

|   |             |             |             |
|---|-------------|-------------|-------------|
| H | 1.03852561  | -3.41632727 | -0.01905998 |
| C | -0.73711354 | -1.27274998 | -0.08957679 |
| C | -1.49449360 | -2.44143128 | -0.05304602 |
| C | -2.88241683 | -2.36531389 | -0.05336099 |
| H | -1.03269839 | -3.41865088 | -0.01893411 |
| C | -2.67386286 | 0.01321820  | -0.12910749 |
| C | -3.48589761 | -1.10898403 | -0.09098911 |
| H | -3.10064390 | 1.00657660  | -0.15230531 |
| H | -4.56211785 | -1.00261470 | -0.08648412 |
| N | -1.33243675 | -0.05410735 | -0.13296038 |
| N | 1.33072464  | -0.05132457 | -0.13908327 |
| C | -3.65744149 | -3.64250566 | -0.01048703 |
| O | -3.15718228 | -4.73773717 | 0.01329184  |
| O | -4.98851026 | -3.43219742 | -0.00283474 |
| H | -5.42211071 | -4.29860761 | 0.02925032  |
| C | 3.66374844  | -3.63460587 | -0.01905479 |
| O | 3.16588081  | -4.73081424 | 0.00954153  |
| O | 4.99439371  | -3.42152549 | -0.01770998 |
| H | 5.42992396  | -4.28695883 | 0.01461316  |

**Table S1.** Summarised TDDFT data for **AS16-18** and **1-3** for selected transitions.

| Complex     | Transition     | Energy | $\lambda$ | $f$     | Composition       | Character |
|-------------|----------------|--------|-----------|---------|-------------------|-----------|
| <b>AS16</b> | S <sub>1</sub> | 2.364  | 524       | 0.00362 | HOMO→LUMO 90%     | MLCT      |
|             | S <sub>5</sub> | 2.743  | 452       | 0.15    | HOMO-1→LUMO 54%   | MLCT      |
|             |                |        |           |         | HOMO-1→LUMO+1 27% | MLCT      |
|             | S <sub>8</sub> | 3.004  | 412       | 0.11    | HOMO-2→LUMO+1 49% | MLCT      |
|             |                |        |           |         | HOMO-1→LUMO+2 36% | MLCT      |
|             |                |        |           |         | HOMO-1→LUMO+1 7%  | MLCT      |

|             |                 |       |     |         |                    |           |
|-------------|-----------------|-------|-----|---------|--------------------|-----------|
|             | S <sub>9</sub>  | 3.105 | 399 | 0.05    | HOMO→LUMO+3 54%    | MLCT      |
|             |                 |       |     |         | HOMO-2→LUMO+2 21%  | MLCT      |
|             |                 |       |     |         | HOMO-1→LUMO+2 8%   | MLCT      |
|             | S <sub>11</sub> | 3.296 | 376 | 0.02    | HOMO-1→LUMO+3 68%  | MLCT      |
|             |                 |       |     |         | HOMO-2→LUMO+3 21%  | MLCT      |
|             |                 |       |     |         |                    |           |
| <b>AS17</b> | S <sub>1</sub>  | 2.199 | 563 | 0.00061 | HOMO→LUMO 96%      | MLCT/LLCT |
|             | S <sub>4</sub>  | 2.947 | 421 | 0.03    | HOMO-1→LUMO 68%    | MLCT/LLCT |
|             |                 |       |     |         | HOMO-2→LUMO 21%    | MLCT/LLCT |
|             | S <sub>5</sub>  | 3.144 | 394 | 0.05    | HOMO→LUMO+2 92%    | MLCT/ILCT |
|             | S <sub>6</sub>  | 3.152 | 393 | 0.08    | HOMO-3→LUMO 81%    | MLCT/LLCT |
|             | S <sub>9</sub>  | 3.399 | 365 | 0.02    | HOMO-5→LUMO 88%    | MLCT/LLCT |
|             | S <sub>12</sub> | 3.611 | 343 | 0.03    | HOMO-4→LUMO+1 12%  | MLCT/LLCT |
|             |                 |       |     |         | HOMO-2→LUMO+1 77%  | MLCT/LLCT |
|             |                 |       |     |         |                    |           |
| <b>AS18</b> | S <sub>1</sub>  | 2.599 | 476 | 0.0037  | HOMO→LUMO 96%      | MLCT/LLCT |
|             | S <sub>2</sub>  | 2.796 | 443 | 0.08    | HOMO-1→LUMO 96%    | MLCT/LLCT |
|             | S <sub>4</sub>  | 3.360 | 369 | 0.02    | HOMO→LUMO+1 94%    | LLCT/MLCT |
|             | S <sub>9</sub>  | 4.062 | 305 | 0.05    | HOMO-3→LUMO 38%    | ILCT      |
|             |                 |       |     |         | HOMO-5→LUMO 28%    | LLCT/MLCT |
|             |                 |       |     |         | HOMO-4→LUMO 20%    | LLCT/MLCT |
|             |                 |       |     |         |                    |           |
| <b>1</b>    | S <sub>1</sub>  | 2.257 | 549 | 0.00345 | HOMO→LUMO 96%      | MLCT      |
|             | S <sub>3</sub>  | 2.697 | 460 | 0.10    | HOMO-2→LUMO 81%    | MLCT      |
|             | S <sub>5</sub>  | 2.769 | 448 | 0.01    | HOMO→LUMO+2 90%    | MLCT      |
|             | S <sub>8</sub>  | 3.077 | 403 | 0.10    | HOMO-2→LUMO +2 47% | MLCT      |
|             |                 |       |     |         | HOMO-1→LUMO+1 49%  | MLCT      |
|             | S <sub>9</sub>  | 3.119 | 397 | 0.08    | HOMO→LUMO+3 56%    | MLCT      |
|             |                 |       |     |         | HOMO-1→LUMO+2 30%  | MLCT      |



|          |                 |       |     |         |                   |           |
|----------|-----------------|-------|-----|---------|-------------------|-----------|
|          | S <sub>10</sub> | 3.250 | 382 | 0.10    | HOMO-1→LUMO+4 54% | MLCT      |
|          |                 |       |     |         | HOMO-2→LUMO+2 6%  | MLCT      |
|          |                 |       |     |         | HOMO-1→LUMO+2 23% | MLCT      |
|          |                 |       |     |         | HOMO→LUMO+3 10%   | MLCT      |
|          | S <sub>12</sub> | 3.349 |     | 0.04    | HOMO-2→LUMO+3 72% | MLCT      |
|          |                 |       |     |         | HOMO→LUMO+4 21%   | MLCT      |
|          | S <sub>13</sub> | 3.398 | 365 | 0.04    | HOMO-1→LUMO+3 36% | MLCT      |
|          |                 |       |     |         | HOMO→LUMO+3 21%   | MLCT      |
|          |                 |       |     |         | HOMO-1→LUMO+2 12% | MLCT      |
|          | S <sub>15</sub> | 3.527 | 352 | 0.04    | HOMO-2→LUMO+4 87% | MLCT      |
| <b>2</b> | S <sub>1</sub>  | 2.024 | 612 | 0.00036 | HOMO→LUMO 99%     | MLCT/LLCT |
|          | S <sub>6</sub>  | 3.033 | 409 | 0.08    | HOMO-3→LUMO 84%   | MLCT/LLCT |
|          | S <sub>8</sub>  | 3.166 | 392 | 0.05    | HOMO→LUMO+3 86%   | MLCT/ILCT |
|          | S <sub>12</sub> | 3.602 | 344 | 0.06    | HOMO-4→LUMO+1 12% | MLCT/LLCT |
|          |                 |       |     |         | HOMO-2→LUMO+1 81% | MLCT/LLCT |
| <b>3</b> | S <sub>1</sub>  | 2.411 | 514 | 0.00525 | HOMO→LUMO 99%     | MLCT/LLCT |
|          | S <sub>2</sub>  | 2.631 | 471 | 0.07    | HOMO-1→LUMO 96%   | MLCT/LLCT |
|          | S <sub>4</sub>  | 3.253 | 381 | 0.04    | HOMO→LUMO+1 96%   | MLCT/LLCT |
|          | S <sub>5</sub>  | 3.311 | 374 | 0.02    | HOMO-1→LUMO+1 96% | MLCT/LLCT |
|          | S <sub>9</sub>  | 3.905 | 318 | 0.04    | HOMO-5→LUMO 49%   | LLCT/MLCT |
|          |                 |       |     |         | HOMO-3→LUMO 47%   | ILCT      |
|          | S <sub>10</sub> | 3.977 | 312 | 0.07    | HOMO-4→LUMO 94%   | LLCT      |

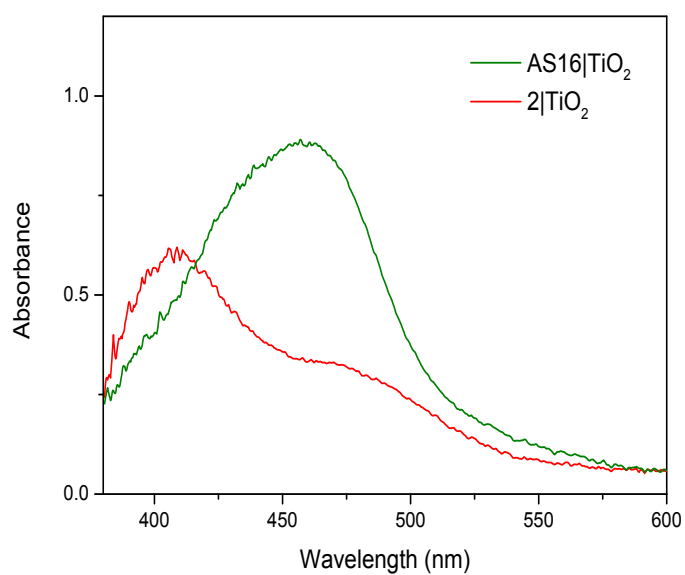

**Figure S17.** UV-vis absorption spectra of **2** and **AS16** adsorbed onto a  $\text{TiO}_2$  electrode.

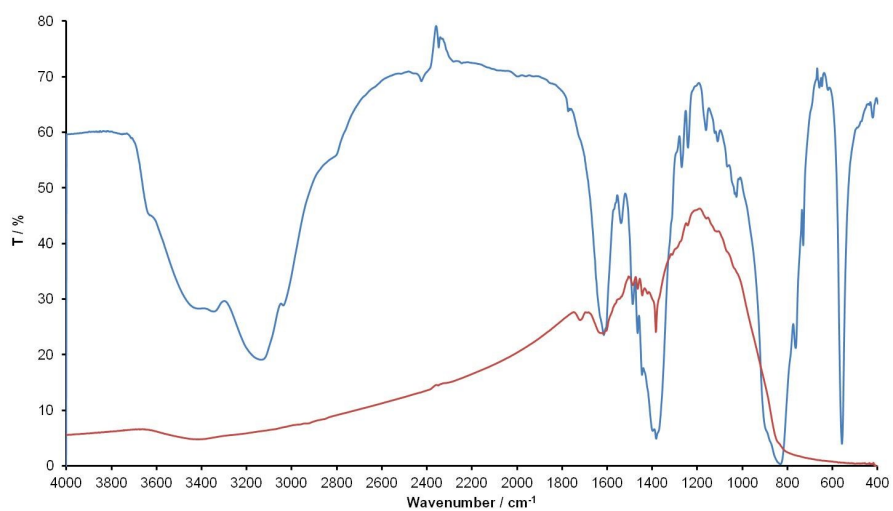

**Figure S18.** Infrared spectra of **AS16** (KBr disc, blue trace) and **AS16** immobilised on  $\text{TiO}_2$  (KBr disc, red trace).
